# Supplementary material for: Nek5 promotes centrosome integrity in interphase and loss of centrosome cohesion in mitosis
Source: PubMed Central journal article supplement — J Cell Biol. 2015 May 11;209(3):339–48. doi: 10.1083/jcb.201412099 (PMC4427792; doi:10.1083/jcb.201412099), 2015-05-11
Supplement: supp_jcb.201412099_JCB_201412099_sm.pdf [file supp_jcb.201412099_JCB_201412099_sm.pdf]

Prosser et al., <http://www.jcb.org/cgi/content/full/jcb.201412099/DC1>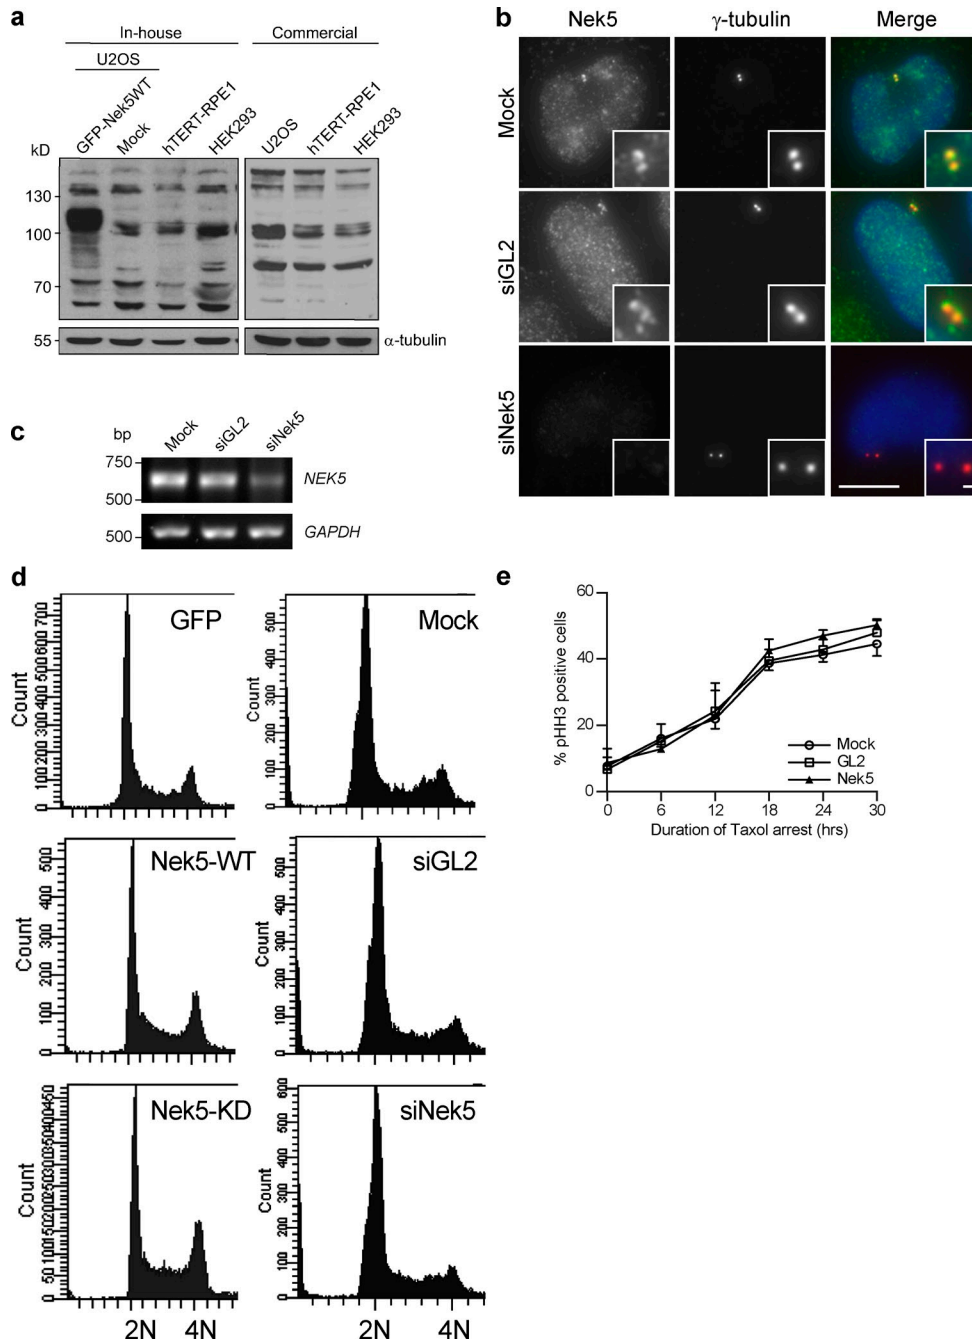

Figure S1. **Nek5 antibody characterization and demonstration that loss of Nek5 function does not substantially alter cell cycle distribution or the spindle assembly checkpoint.** (a) Western blot analysis of untransfected U2OS cells, U2OS cells transiently transfected with GFP-Nek5 for 24 h, hTERT-RPE1 cells, and HEK293 cells. Blots were probed with either the in-house or commercial Nek5 antibody as indicated.  $\alpha$ -Tubulin was used as a loading control. The GFP-Nek5 and mock-transfected samples from the in-house and  $\alpha$ -tubulin blots also appear in Fig. 1 c. (b) Staining of Nek5 with commercial antibody and  $\gamma$ -tubulin in U2OS cells transfected with Nek5- or GL2-specific siRNAs for 48 h. Bars: (main images) 10  $\mu$ m; (insets) 1  $\mu$ m. (c) RT-PCR of Nek5 and GAPDH with RNA collected after 48 h of siRNA treatment of U2OS cells with mock-, GL2-, or Nek5-depleted siRNAs. (d) DNA profiles from flow cytometry analysis of U2OS cells transfected with GFP, GFP-Nek5WT (WT), or GFP-Nek5KD (KD) constructs and mock-, GL2-, or Nek5-depleted cells for 48 h.  $n = 2$ . (e) Percentage of phospho-histone H3 (pHH3)-positive cells during the time course of taxol treatment in mock-, GL2-, or Nek5-depleted cells. Data are mean  $\pm$  SD;  $n = 3$ ; 200 cells per experiment.

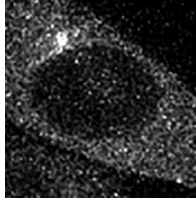

Video 1. **A control GL2-depleted HeLa::GFP- $\alpha$ -tubulin cell progressing through mitosis.** HeLa cells stably expressing GFP- $\alpha$ -tubulin were transfected with siRNA against GL2 for 40 h before the commencement of imaging. Images were captured using a laser-scanning confocal microscope (TCS SP5; Leica). Time is given in minutes and  $t = 00:00$  is defined as the frame in which a distinct MTOC becomes visible. Frames were taken every 5 min. Stills from this video appear in Fig. 5 a.

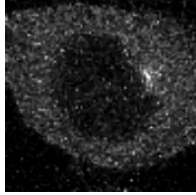

Video 2. **A control GL2-depleted HeLa::GFP- $\alpha$ -tubulin cell progressing through mitosis.** HeLa cells stably expressing GFP- $\alpha$ -tubulin were transfected with siRNA against GL2 for 40 h before the commencement of imaging. Images were captured using a laser-scanning confocal microscope (TCS SP5; Leica). Time is given in minutes and  $t = 00:00$  is defined as the frame in which a distinct MTOC becomes visible. Frames were taken every 5 min.

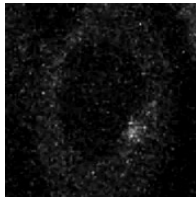

Video 3. **A control GL2-depleted HeLa::GFP- $\alpha$ -tubulin cell progressing through mitosis.** HeLa cells stably expressing GFP- $\alpha$ -tubulin were transfected with siRNA against GL2 for 40 h before the commencement of imaging. Images were captured using a laser-scanning confocal microscope (TCS SP5; Leica). Time is given in minutes and  $t = 00:00$  is defined as the frame in which a distinct MTOC becomes visible. Frames were taken every 5 min.

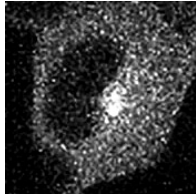

Video 4. **A Nek5-depleted HeLa::GFP- $\alpha$ -tubulin cell progressing through mitosis.** HeLa cells stably expressing GFP- $\alpha$ -tubulin were transfected with siRNA against Nek5 for 40 h before the commencement of imaging. Images were captured using a laser-scanning confocal microscope (TCS SP5; Leica). Time is given in minutes and  $t = 00:00$  is defined as the frame in which a distinct MTOC becomes visible. Frames were taken every 5 min. Stills from this video appear in Fig. 5 a.

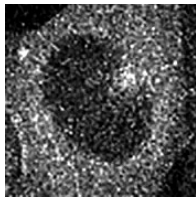

Video 5. **A Nek5-depleted HeLa::GFP- $\alpha$ -tubulin cell progressing through mitosis.** HeLa cells stably expressing GFP- $\alpha$ -tubulin were transfected with siRNA against Nek5 for 40 h before the commencement of imaging. Images were captured using a laser-scanning confocal microscope (TCS SP5; Leica). Time is given in minutes and  $t = 00:00$  is defined as the frame in which a distinct MTOC becomes visible. Frames were taken every 5 min.

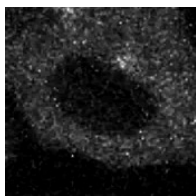

Video 6. **A Nek5-depleted HeLa::GFP- $\alpha$ -tubulin cell progressing through mitosis.** HeLa cells stably expressing GFP- $\alpha$ -tubulin were transfected with siRNA against Nek5 for 40 h before the commencement of imaging. Images were captured using a laser-scanning confocal microscope (TCS SP5; Leica). Time is in minutes and  $t = 00:00$  is defined as the frame in which a distinct MTOC becomes visible. Frames were taken every 5 min.
